# Supplementary material for: Substances of emerging concern in Baltic Sea water: Review on methodological advances for the environmental assessment and proposal for future monitoring
Source: Springer Nature journal article supplement (doi:10.1007/s13280-021-01627-6), 2021-10-12
Supplement: MOESM1 [file 13280_2021_1627_MOESM1_ESM.pdf]

Electronic Supplementary Material

*This supplementary material has not been peer reviewed.*

**Title: Substances of Emerging Concern in Baltic Sea Water – Review on Methodological Advances for the Environmental Assessment and Proposal for Future Monitoring**

Authors: Marion Kanwischer, Noomi Asker, Ann-Sofie Wernersson, Marisa A. Wirth, Kathrin Fisch, Elin Dahlgren, Helena Osterholz, Friederike Habedank, Michael Naumann, Jaakko Mannio, Detlef E. Schulz-Bull

Table S 1 Conducted literature searches following the procedure described by Mengist et al. 2020. For this study, 3 review objectives were defined and the specifications of the conducted searches are described in the respective cell columns. The literature searches were performed from April 2020 to July 2021.

| REVIEW OBJECTIVES AND SCOPE OF THE SEARCHES                                                                                                                                                                                                                                                                            |                                                                                                                                                                                                                                                                                                                                                                                                                                                                                                                                           |                                                                                        |
|------------------------------------------------------------------------------------------------------------------------------------------------------------------------------------------------------------------------------------------------------------------------------------------------------------------------|-------------------------------------------------------------------------------------------------------------------------------------------------------------------------------------------------------------------------------------------------------------------------------------------------------------------------------------------------------------------------------------------------------------------------------------------------------------------------------------------------------------------------------------------|----------------------------------------------------------------------------------------|
| Which concentrations for contaminants of emerging concern are reported for Baltic Sea surface water?                                                                                                                                                                                                                   | Which methodological advances are reported for the chemical analysis of contaminants of emerging concern in marine water?                                                                                                                                                                                                                                                                                                                                                                                                                 | Which effect-based methods exist that could be used for marine water analysis?         |
|                                                                                                                                                                                                                                       |                                                                                                                                                                                                                                                                                                                                                                                                                                                          |     |
| TARGET COMPOUND CLASSES                                                                                                                                                                                                                                                                                                |                                                                                                                                                                                                                                                                                                                                                                                                                                                                                                                                           |                                                                                        |
| pharmaceuticals / UV-filters / estrogens and estrogenic compounds / polar pesticides / per- and polyfluoroalkyl substances / algal toxins                                                                                                                                                                              |                                                                                                                                                                                                                                                                                                                                                                                                                                                                                                                                           |                                                                                        |
| ADDITIONAL CLASSIFICATION                                                                                                                                                                                                                                                                                              |                                                                                                                                                                                                                                                                                                                                                                                                                                                                                                                                           |                                                                                        |
| chemical analysis / effect-based analysis                                                                                                                                                                                                                                                                              | sample processing / analytical approaches / passive sampling                                                                                                                                                                                                                                                                                                                                                                                                                                                                              | <i>in situ</i> field monitoring / <i>in vitro</i> bioassays / effect-directed analysis |
| SEARCH STRATEGY, SOURCES                                                                                                                                                                                                                                                                                               |                                                                                                                                                                                                                                                                                                                                                                                                                                                                                                                                           |                                                                                        |
| • databases Web of Science and HELCOM                                                                                                                                                                                                                                                                                  | • database Web of Science or Science Direct<br>• reports of marine science organizations<br>• reports of water policy working groups                                                                                                                                                                                                                                                                                                                                                                                                      |                                                                                        |
| SEARCH KEYWORDS                                                                                                                                                                                                                                                                                                        |                                                                                                                                                                                                                                                                                                                                                                                                                                                                                                                                           |                                                                                        |
| pharmaceuticals   UV-filter   estrogen   pesticide   perfluoroalkyl   PFAS   nodularin   microcystin   polybrominated phenols   polybrominated dibenzo-p-dioxins   AND Baltic Sea                                                                                                                                      | • sample processing:<br>solid-phase extraction   AND pharmaceutical   UV-filters   UV-stabilizers   estrogen   pesticide   PFAS   perfluoroalkyl  algal toxins AND seawater   marine<br>• analytical approaches:<br>HRMS   FT-ICR-MS   Orbitrap   MS-MS mass-spectrometry   multi method AND contaminant AND marine   ocean   seawater<br>• passive sampling:<br>passive sampling AND seawater<br>• effect-based methods:<br>effect-based   in vitro bioassay   in vivo bioassay   effect-directed analysis AND marine   seawater   water |                                                                                        |
| INCLUSION CRITERIA                                                                                                                                                                                                                                                                                                     |                                                                                                                                                                                                                                                                                                                                                                                                                                                                                                                                           |                                                                                        |
| • within review objective from title and abstract<br>• accessible<br>• English language                                                                                                                                                                                                                                | • within review objective from title and abstract<br>• accessible<br>• English language<br>• reports not older than 2010<br>• method applied in seawater or promising for seawater analysis                                                                                                                                                                                                                                                                                                                                               |                                                                                        |
| EXTRACTED INFORMATION                                                                                                                                                                                                                                                                                                  |                                                                                                                                                                                                                                                                                                                                                                                                                                                                                                                                           |                                                                                        |
| • Baltic Sea study area<br>• study year<br>• mode of assessment (chemical or effect-based)<br>• method details<br>• surface seawater conc.                                                                                                                                                                             | • description of the method<br>• reported limitations<br>• example study sites and key findings                                                                                                                                                                                                                                                                                                                                                                                                                                           |                                                                                        |
| ANALYSIS                                                                                                                                                                                                                                                                                                               |                                                                                                                                                                                                                                                                                                                                                                                                                                                                                                                                           |                                                                                        |
| • summary or reported data<br>• outlining predominant substances within compound classes for the Baltic Sea<br>• describing methods for chemical and effect-based analysis potentially suitable for analysis of marine water<br>• built recommendations for improved assessment of the state of the Baltic Sea on data |                                                                                                                                                                                                                                                                                                                                                                                                                                                                                                                                           |                                                                                        |

## References

- Mengist, W., T. Soromessa, and G. Legese. 2020. Method for conducting systematic literature review and meta-analysis for environmental science research. *MethodsX* 7: 100777. doi:10.1016/j.mex.2019.100777.
